# Supplementary material for: Positive and Negative Design in Stability and Thermal Adaptation of Natural Proteins
Source: PLOS journal article supplement (doi:10.1371/journal.pcbi.0030052), 2007-03-21
Supplement: S1 (10.1371/journal.pcbi.0030052.s001) [file journal.pcbi.0030052.s001]

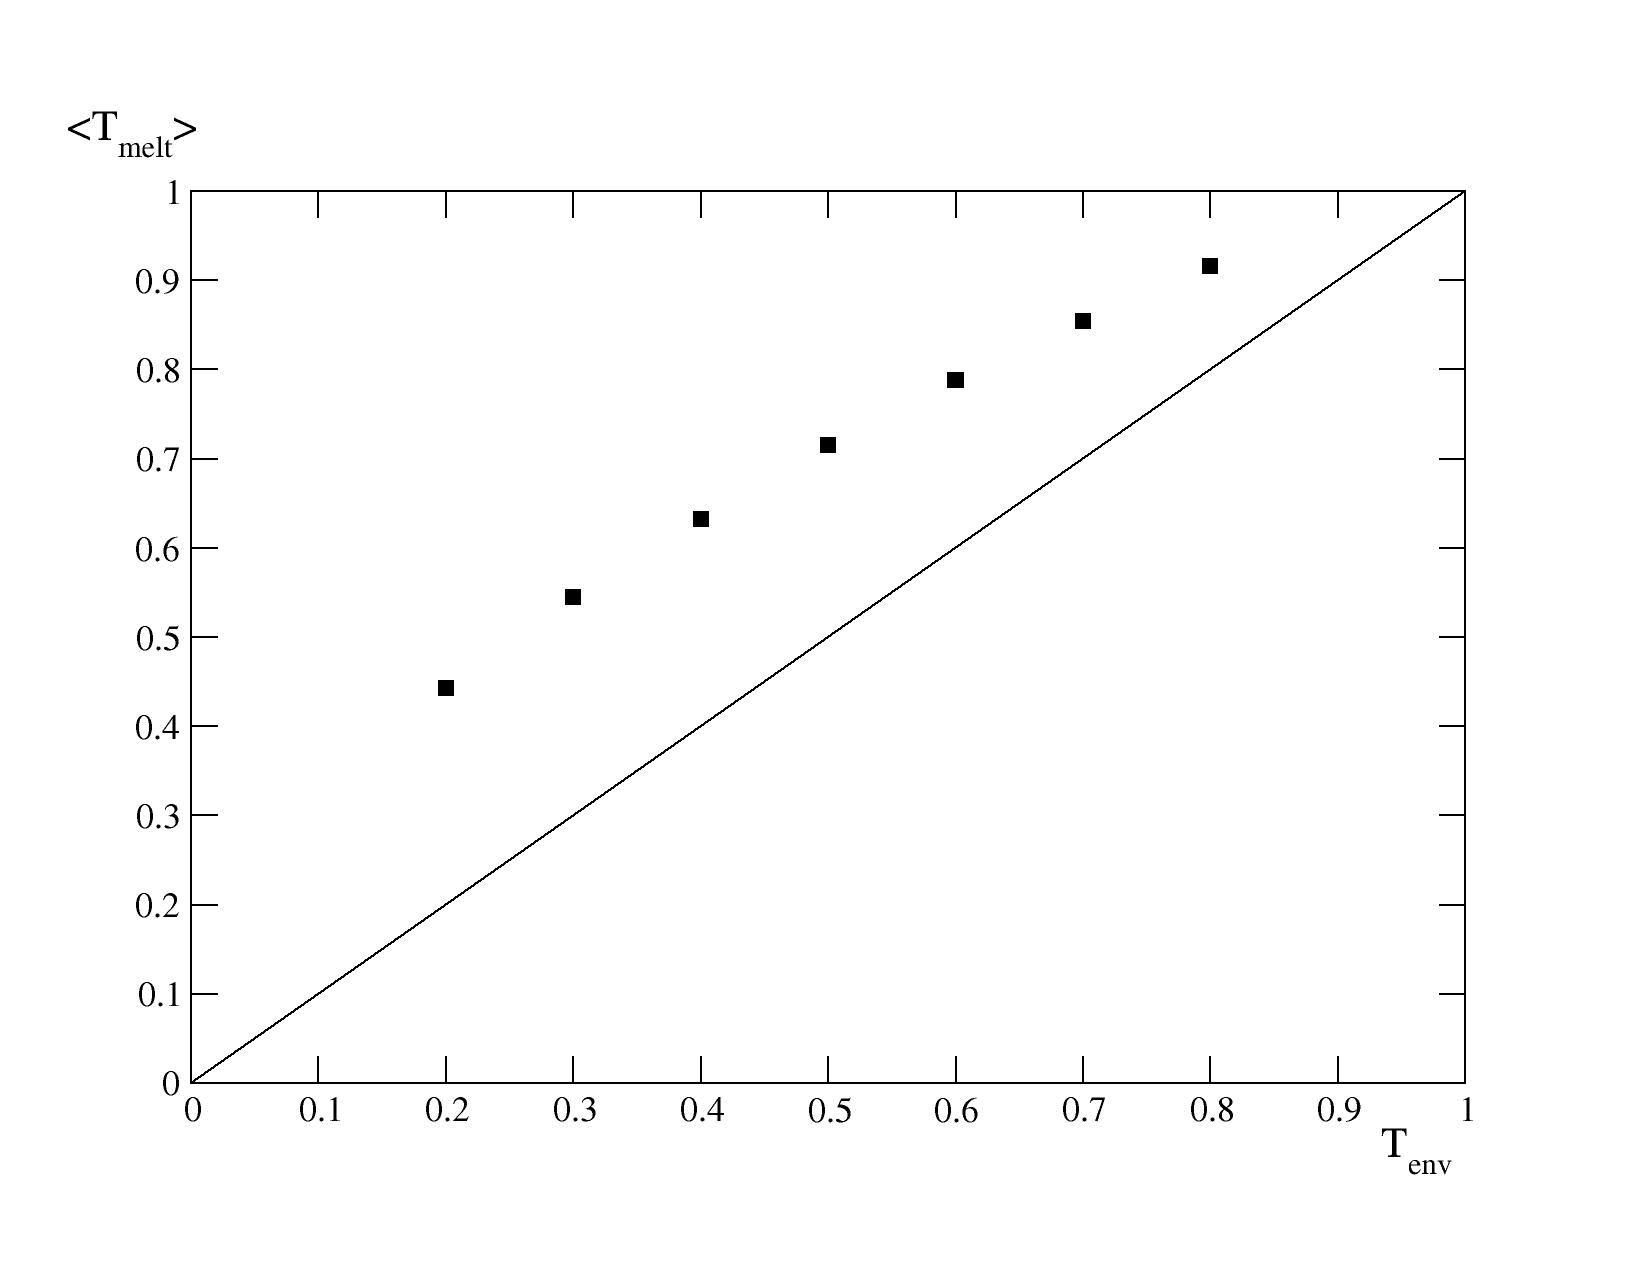


**Figure S1.** Average melting temperature of designed lattice proteomes (5000 sequences each) depending on the environmental temperature entering the P-design procedure (2000 Monte Carlo mutation steps to generate each sequence).
